# Supplementary material for: Mixed anion/cation redox in K0.78Fe1.60S2 for a high-performance cathode in potassium ion batteries
Source: Royal Society of Chemistry journal article supplement (doi:10.1039/d0qi00184h), 2020-01-01

## Supplementary data

### Mixed anion/cation redox in $K_{0.78}Fe_{1.60}S_2$ for a high-performance cathode in potassium ion batteries

Su Cheol Han,<sup>‡a</sup> Woon Bae Park,<sup>‡a</sup> Kee-Sun Sohn<sup>\*b</sup> and MyoungHo Pyo<sup>\*a</sup>

<sup>a</sup> *Department of Printed Electronics Engineering, Suncheon National University, Suncheon, Chonnam 57922,*

*Republic of Korea. E-mail: mho@suncheon.ac.kr*

<sup>b</sup> *Faculty of Nanotechnology and Advanced Materials Engineering, Sejong University, Seoul 05006,*

*Republic of Korea. E-mail: kssohn@sejong.ac.kr*

<sup>‡</sup> These authors contributed equally to this work.

## List of contents

|                                                                                                             |    |
|-------------------------------------------------------------------------------------------------------------|----|
| <b>Fig. S1</b> EDX maps and spectra of charged and discharged $K_{0.78}Fe_{1.60}S_2$ .....                  | 1  |
| <b>Fig. S2</b> XPS spectra of half-charged $K_{0.78}Fe_{1.60}S_2$ .....                                     | 2  |
| <b>Fig. S3</b> Full in-situ XRD patterns during the 1 <sup>st</sup> C/D of $K_{0.78}Fe_{1.60}S_2$ .....     | 3  |
| <b>Table S1</b> Summary of DFT calculation results for 161 configurations .....                             | 4  |
| <b>Fig. S4</b> DFT-calculated band structures and the orbital-projected PDOS .....                          | 5  |
| <b>Fig. S5</b> Cycle stability and Coulombic efficiency during 100 C/D cycles at $20\text{mA g}^{-1}$ ..... | 19 |

Fig. S1 EDX maps and spectra of (A) charged and (B) discharged  $K_{0.78}Fe_{1.60}S_2$

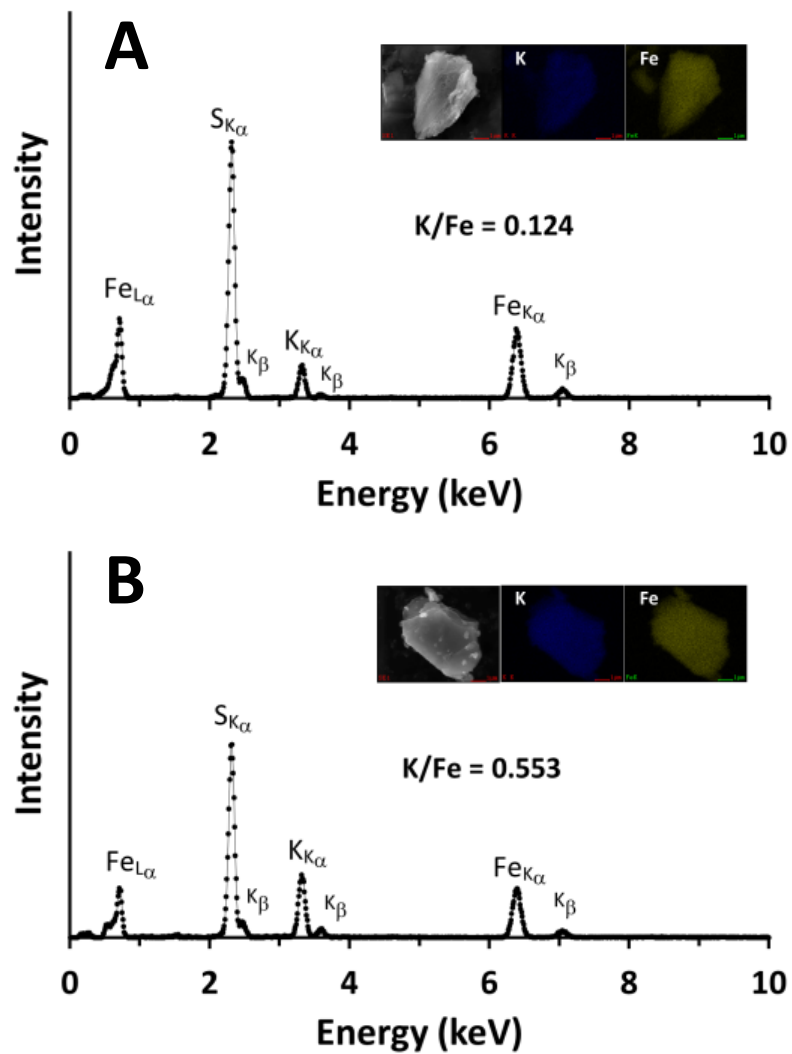

Fig. S2 XPS spectra of half-charged  $K_{0.78}Fe_{1.60}S_2$ . The spectra reveals that the charge accompanies simultaneous oxidation of Fe(II) and  $S^{2-}$ .

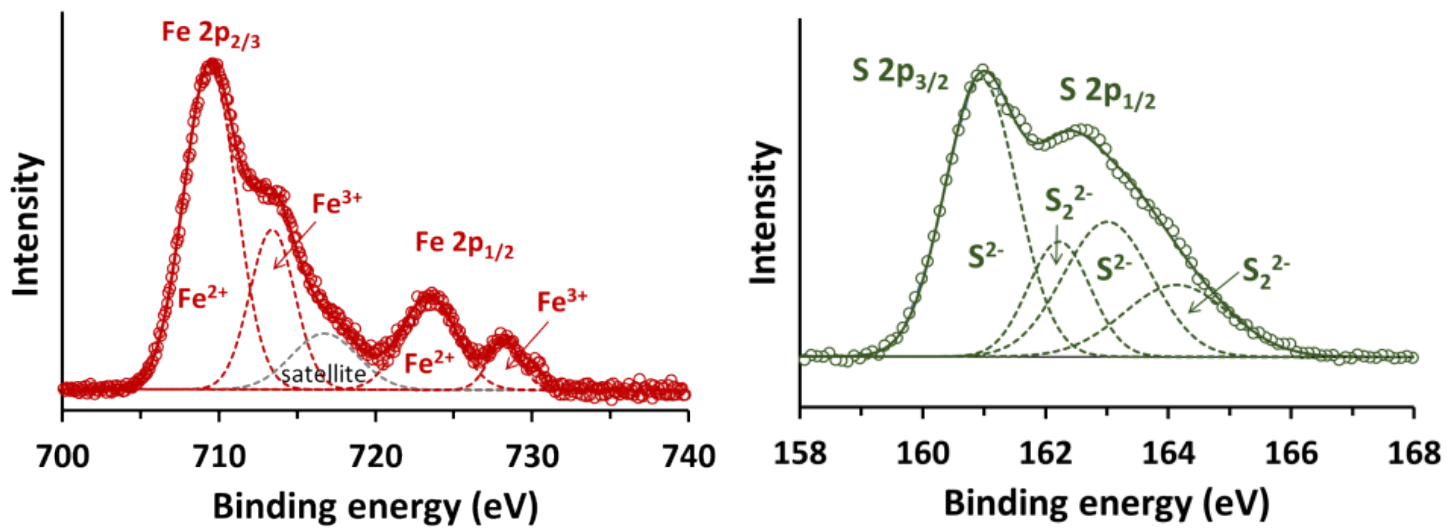

Fig. S3 Full in-situ XRD patterns during the 1<sup>st</sup> C/D of  $K_{0.78}Fe_{1.60}S_2$ .

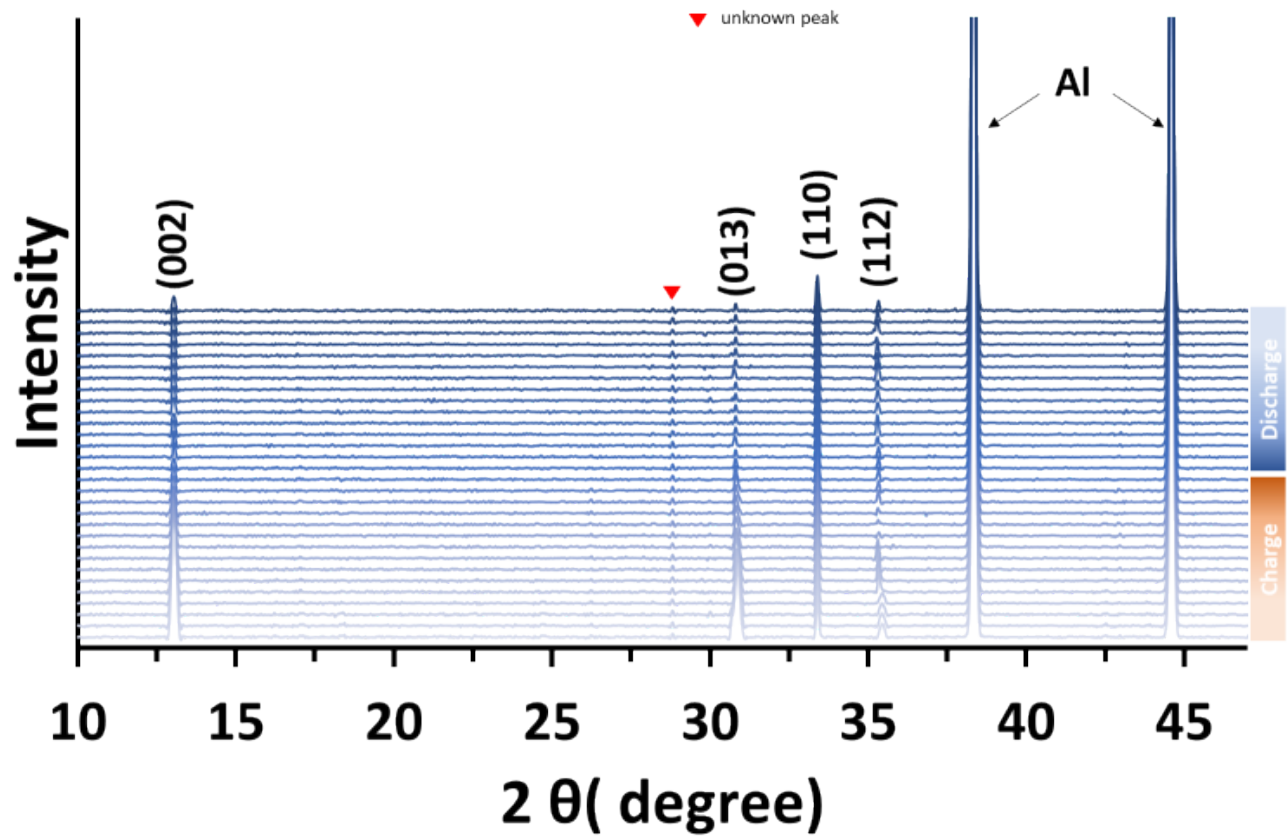

**Table S1** Summary of DFT calculation results for 161 configurations.

| Supercell No. | VASP energy(eV) | *Bandgap type | Total Bandgap(eV) | Supercell No. | VASP energy(eV) | *Bandgap type | Total Bandgap(eV) | Supercell No. | VASP energy(eV) | *Bandgap type | Total Bandgap(eV) | Supercell No. | VASP energy(eV) | *Bandgap type | Total Bandgap(eV) |
|---------------|-----------------|---------------|-------------------|---------------|-----------------|---------------|-------------------|---------------|-----------------|---------------|-------------------|---------------|-----------------|---------------|-------------------|
| 1             | -172.794469     | I             | 0.316             | 42            | -173.272883     | D             | 0.862             | 83            | -171.237315     | D             | 0.528             | 124           | -173.142973     | I             | 0.086             |
| 2             | -172.563275     | D             | 0.280             | 43            | -172.473482     | I             | 0.283             | 84            | -171.099646     | I             | 0.672             | 125           | -172.837015     | MM            |                   |
| 3             | -172.757400     | I             | 0.301             | 44            | -173.263523     | I             | 0.500             | 85            | -171.142724     | I             | 0.668             | 126           | -173.170710     | D             | 0.190             |
| 4             | -172.517168     | I             | 0.337             | 45            | -170.638650     | I             | 0.000             | 86            | -170.940539     | MM            |                   | 127           | -172.794169     | I             | 0.287             |
| 5             | -172.732480     | I             | 0.354             | 46            | -170.946143     | I             | 0.000             | 87            | -170.987733     | I             | 0.527             | 128           | -173.246998     | I             | 0.513             |
| 6             | -172.690145     | I             | 0.282             | 47            | -170.476569     | I             | 0.874             | 88            | -170.689063     | I             | 0.332             | 129           | -172.705268     | I             | 0.136             |
| 7             | -172.800289     | I             | 0.279             | 48            | -171.122553     | I             | 0.626             | 89            | -173.149569     | I             | 0.211             | 130           | -172.934492     | I             | 0.186             |
| 8             | -173.304633     | I             | 0.511             | 49            | -170.484864     | I             | 0.000             | 90            | -172.679988     | MM            |                   | 131           | -173.174377     | I             | 0.181             |
| 9             | -172.845096     | D             | 0.293             | 50            | -171.335331     | I             | 0.784             | 91            | -172.248640     | MM            |                   | 132           | -172.946475     | I             | 0.198             |
| 10            | -173.319979     | D             | 0.782             | 51            | -170.578460     | MM            |                   | 92            | -173.195711     | D             | 0.172             | 133           | -172.745582     | I             | 0.277             |
| 11            | -172.586786     | I             | 0.364             | 52            | -170.047491     | I             | 0.000             | 93            | -172.791984     | MM            |                   | 134           | -173.173524     | D             | 0.160             |
| 12            | -173.213713     | D             | 0.617             | 53            | -171.289918     | I             | 0.751             | 94            | -173.226819     | I             | 0.324             | 135           | -172.497043     | MM            |                   |
| 13            | -172.781588     | I             | 0.353             | 54            | -170.326907     | MM            |                   | 95            | -172.491530     | I             | 0.154             | 136           | -173.188443     | D             | 0.207             |
| 14            | -173.241291     | I             | 0.680             | 55            | -170.563609     | I             | 0.000             | 96            | -172.989819     | I             | 0.369             | 137           | -172.724896     | I             | 0.049             |
| 15            | -172.742485     | D             | 0.358             | 56            | -170.727715     | I             | 0.597             | 97            | -173.080514     | I             | 0.227             | 138           | -172.920596     | I             | 0.292             |
| 16            | -173.248933     | D             | 0.448             | 57            | -170.362493     | I             | 0.000             | 98            | -173.320510     | D             | 0.593             | 139           | -172.671997     | D             | 0.277             |
| 17            | -172.513452     | D             | 0.374             | 58            | -170.288951     | MM            |                   | 99            | -172.424863     | MM            |                   | 140           | -173.013008     | D             | 0.414             |
| 18            | -173.355325     | I             | 0.758             | 59            | -170.624089     | I             | 0.548             | 100           | -172.710805     | I             | 0.126             | 141           | -172.983175     | I             | 0.539             |
| 19            | -173.238444     | I             | 0.664             | 60            | -170.820380     | MM            |                   | 101           | -173.119070     | I             | 0.071             | 142           | -173.040030     | I             | 0.345             |
| 20            | -172.702348     | I             | 0.390             | 61            | -170.710600     | MM            |                   | 102           | -172.952172     | I             | 0.319             | 143           | -172.910824     | I             | 0.397             |
| 21            | -172.657223     | I             | 0.282             | 62            | -170.278581     | MM            |                   | 103           | -172.482275     | I             | 0.165             | 144           | -173.282818     | D             | 0.449             |
| 22            | -172.471387     | I             | 0.358             | 63            | -172.795480     | I             | 0.384             | 104           | -173.154162     | D             | 0.171             | 145           | -173.245419     | D             | 0.458             |
| 23            | -172.833554     | I             | 0.303             | 64            | -172.708923     | I             | 0.324             | 105           | -172.876819     | I             | 0.075             | 146           | -173.268728     | D             | 0.417             |
| 24            | -172.688943     | D             | 0.366             | 65            | -173.151347     | D             | 0.609             | 106           | -173.142482     | I             | 0.188             | 147           | -172.725880     | D             | 0.297             |
| 25            | -173.372098     | D             | 0.813             | 66            | -172.570623     | D             | 0.388             | 107           | -172.212731     | I             | 0.000             | 148           | -171.007850     | I             | 0.273             |
| 26            | -172.791298     | I             | 0.268             | 67            | -173.270650     | I             | 0.603             | 108           | -172.779149     | I             | 0.071             | 149           | -170.759859     | I             | 0.000             |
| 27            | -172.570008     | D             | 0.416             | 68            | -172.688134     | I             | 0.414             | 109           | -172.819793     | MM            |                   | 150           | -170.974174     | I             | 0.277             |
| 28            | -172.827593     | I             | 0.283             | 69            | -173.263816     | D             | 0.600             | 110           | -173.173959     | I             | 0.201             | 151           | -171.306659     | I             | 0.347             |
| 29            | -172.786428     | I             | 0.311             | 70            | -173.273131     | I             | 0.450             | 111           | -172.636334     | I             | 0.132             | 152           | -170.762469     | I             | 0.131             |
| 30            | -172.517227     | I             | 0.369             | 71            | -172.866800     | D             | 0.310             | 112           | -172.394311     | MM            |                   | 153           | -170.894067     | MM            |                   |
| 31            | -172.707901     | I             | 0.357             | 72            | -173.332993     | D             | 0.666             | 113           | -173.061556     | I             | 0.346             | 154           | -170.197650     | MM            |                   |
| 32            | -172.537918     | I             | 0.390             | 73            | -173.253054     | D             | 0.771             | 114           | -172.782305     | I             | 0.308             | 155           | -173.046075     | I             | 0.316             |
| 33            | -173.217347     | I             | 0.689             | 74            | -172.781227     | D             | 0.361             | 115           | -172.541374     | I             | 0.159             | 156           | -173.106126     | D             | 0.650             |
| 34            | -172.673665     | I             | 0.274             | 75            | -172.755962     | D             | 0.321             | 116           | -173.416481     | D             | 0.743             | 157           | -172.633507     | D             | 0.208             |
| 35            | -173.093225     | D             | 0.375             | 76            | -173.136924     | D             | 0.748             | 117           | -173.049302     | D             | 0.301             | 158           | -173.359521     | I             | 0.717             |
| 36            | -173.370872     | I             | 0.808             | 77            | -172.483943     | I             | 0.338             | 118           | -173.387047     | D             | 0.783             | 159           | -173.042660     | D             | 0.289             |
| 37            | -172.450951     | D             | 0.397             | 78            | -173.470288     | D             | 0.895             | 119           | -172.538186     | I             | 0.063             | 160           | -173.468995     | I             | 0.806             |
| 38            | -172.794141     | D             | 0.366             | 79            | -171.020328     | MM            |                   | 120           | -173.144586     | I             | 0.297             | 161           | -172.541248     | I             | 0.024             |
| 39            | -172.738561     | D             | 0.359             | 80            | -170.521185     | MM            |                   | 121           | -172.430092     | MM            |                   |               |                 |               |                   |
| 40            | -172.742345     | D             | 0.366             | 81            | -170.898735     | MM            |                   | 122           | -173.118980     | I             | 0.166             |               |                 |               |                   |
| 41            | -172.760442     | I             | 0.267             | 82            | -170.576882     | I             | 0.000             | 123           | -172.708731     | MM            |                   |               |                 |               |                   |

\* D = direct; I = indirect; MM = magnetic metal.

**Fig. S4** DFT-calculated band structures and the orbital-projected PDOS.

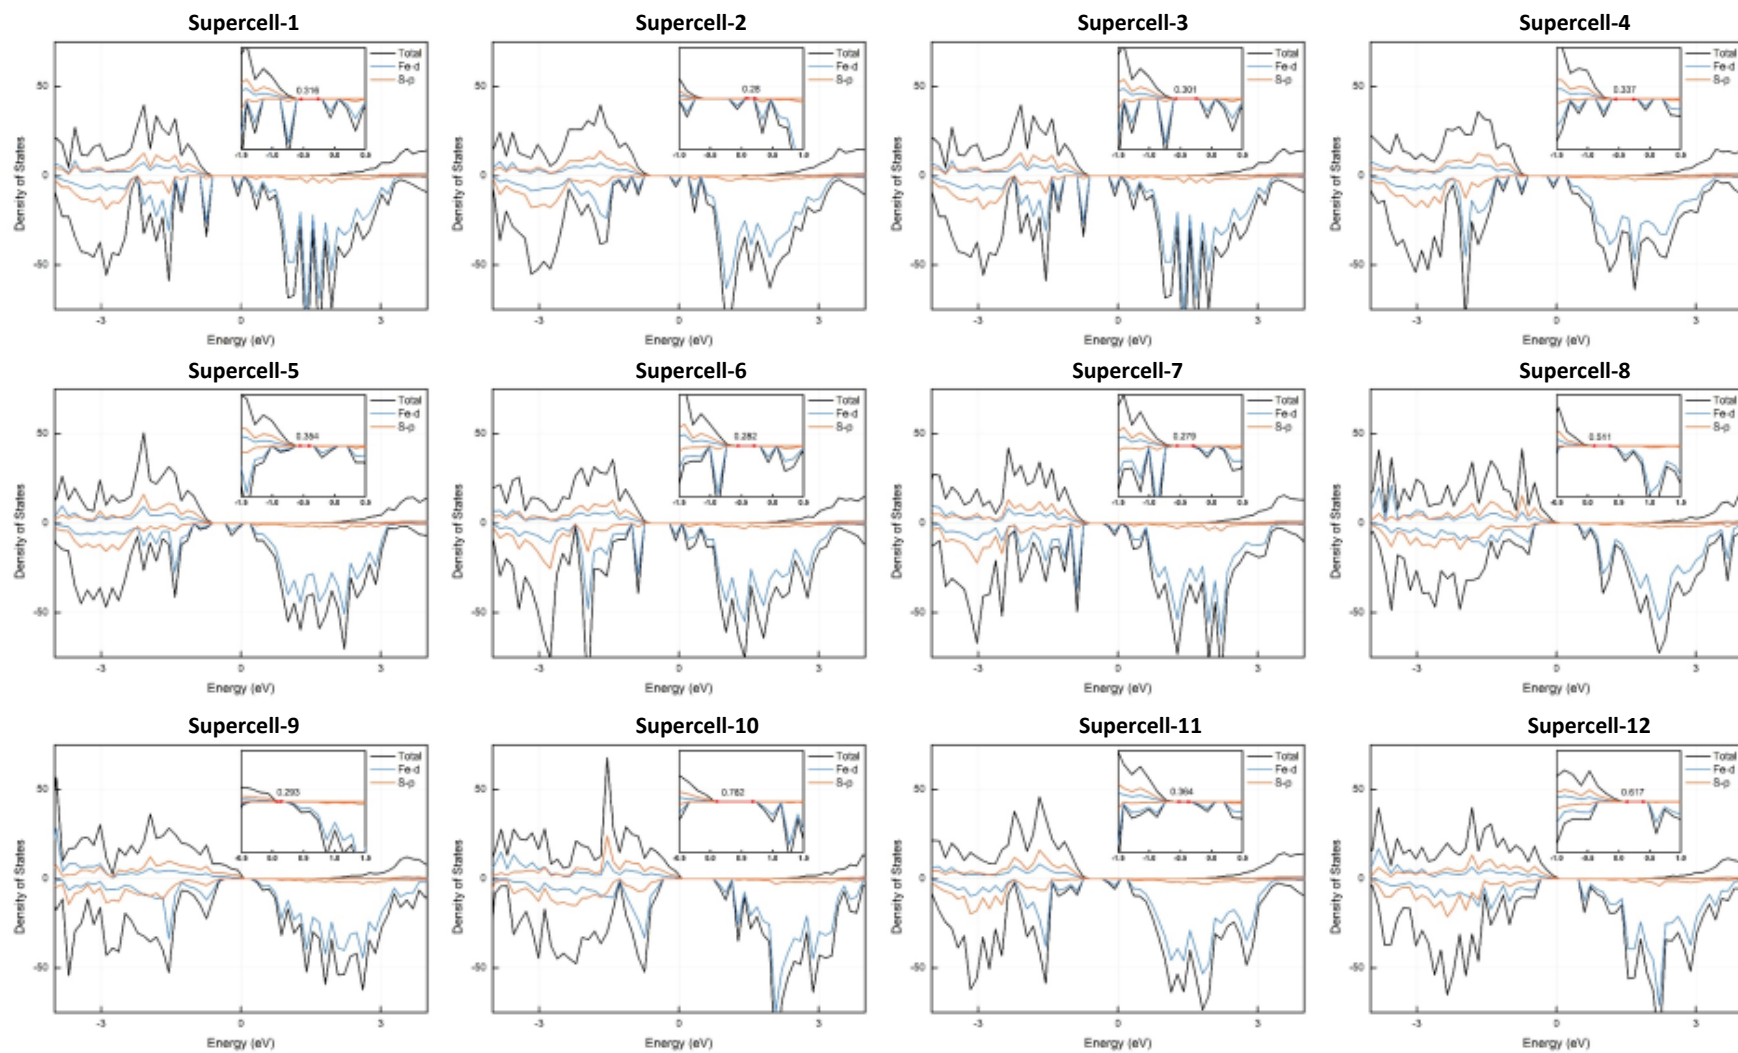

**Fig. S4 (continued)** DFT-calculated band structures and the orbital-projected PDOS.

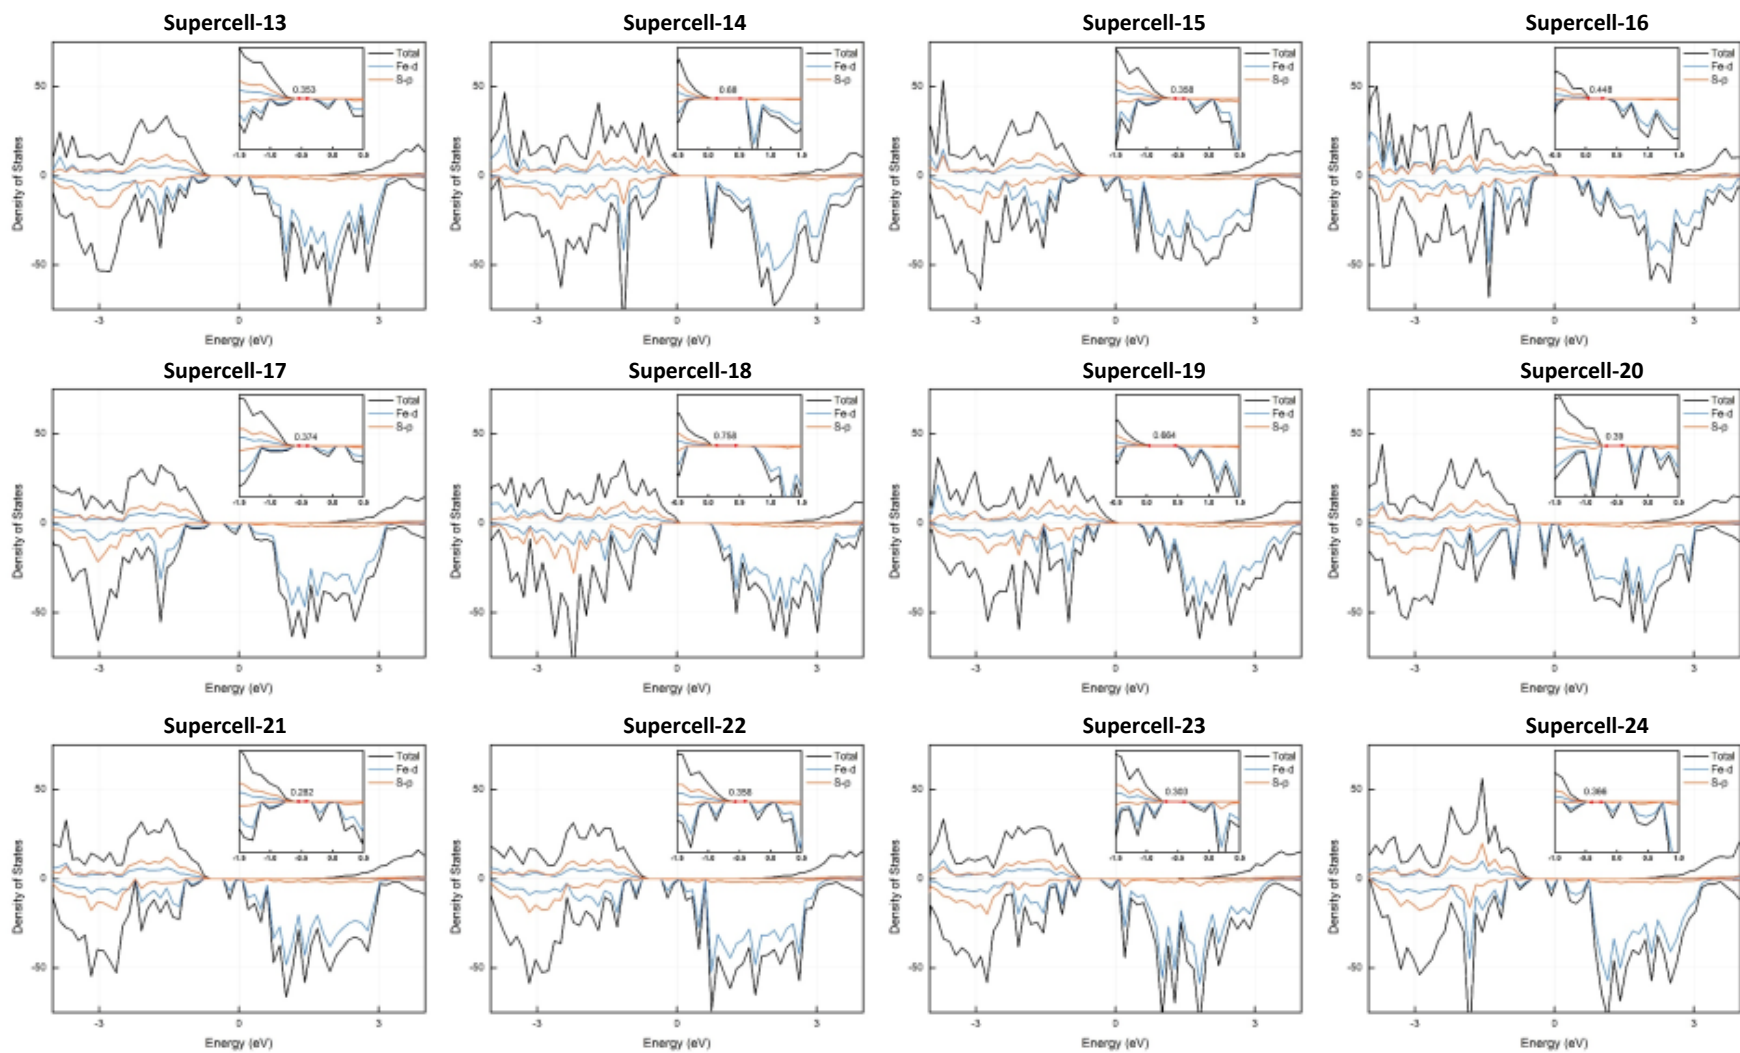



**Fig. S4 (continued)** DFT-calculated band structures and the orbital-projected PDOS.

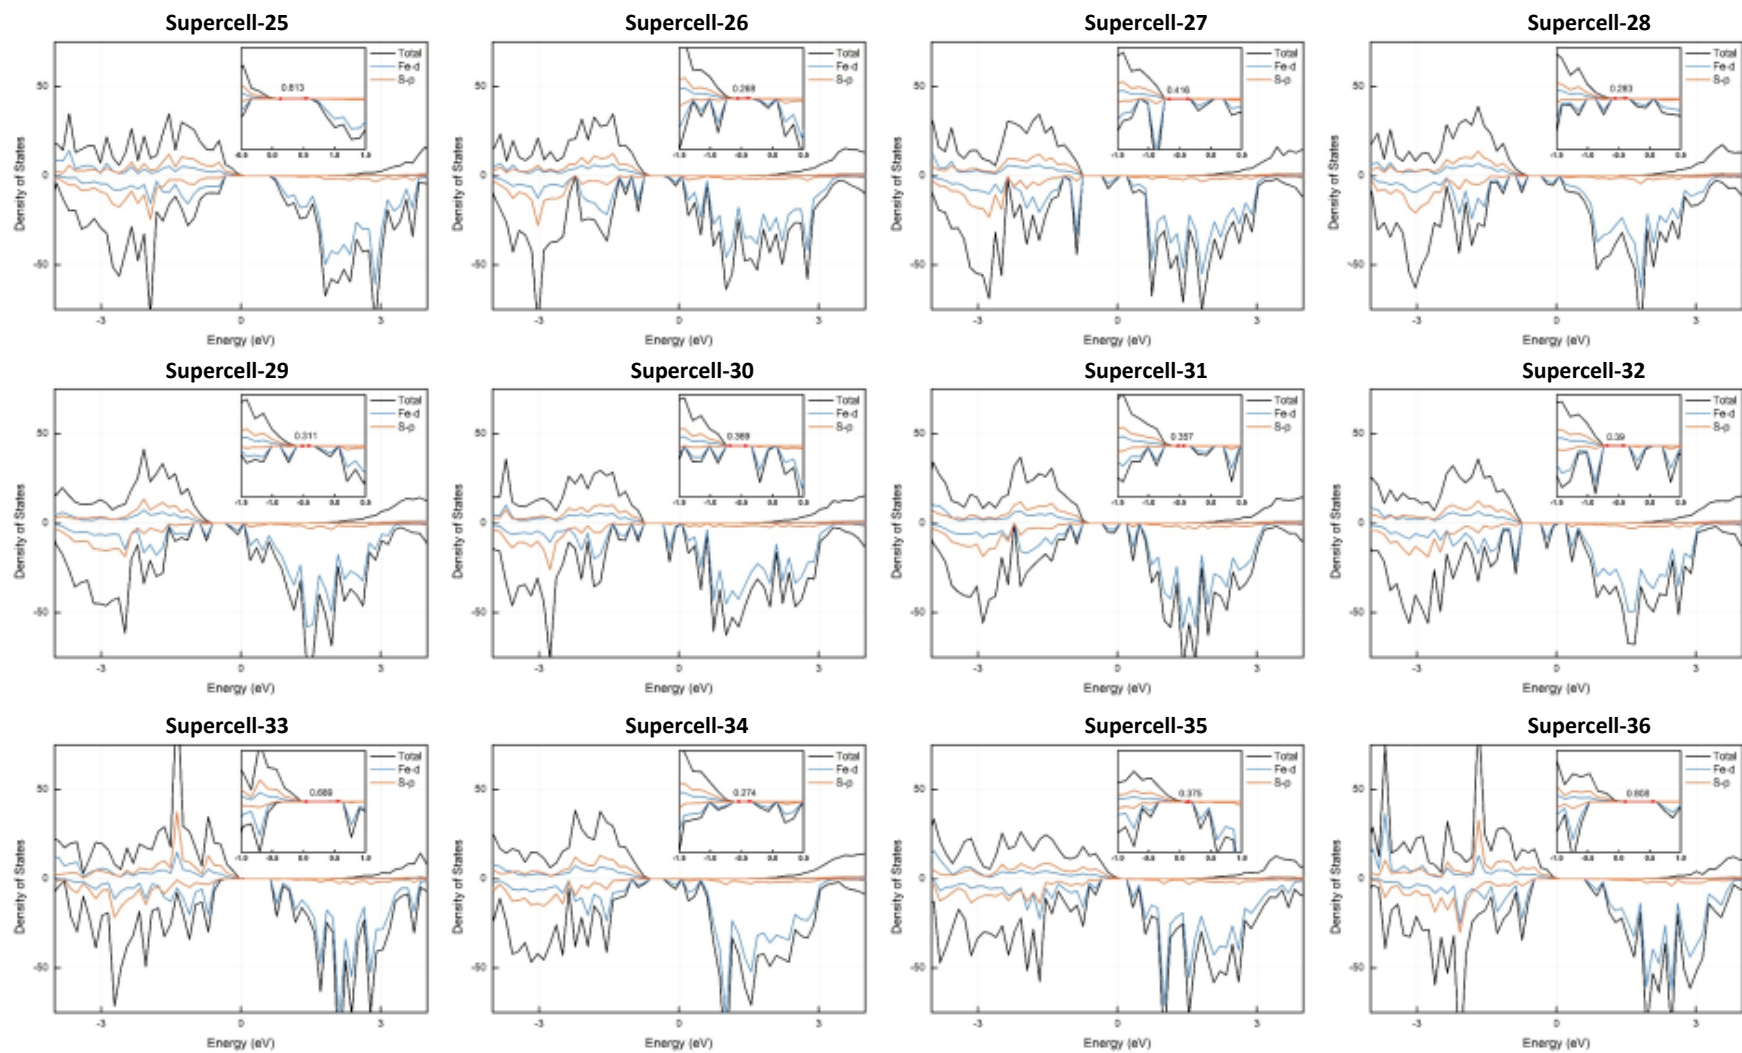

**Fig. S4 (continued)** DFT-calculated band structures and the orbital-projected PDOS.

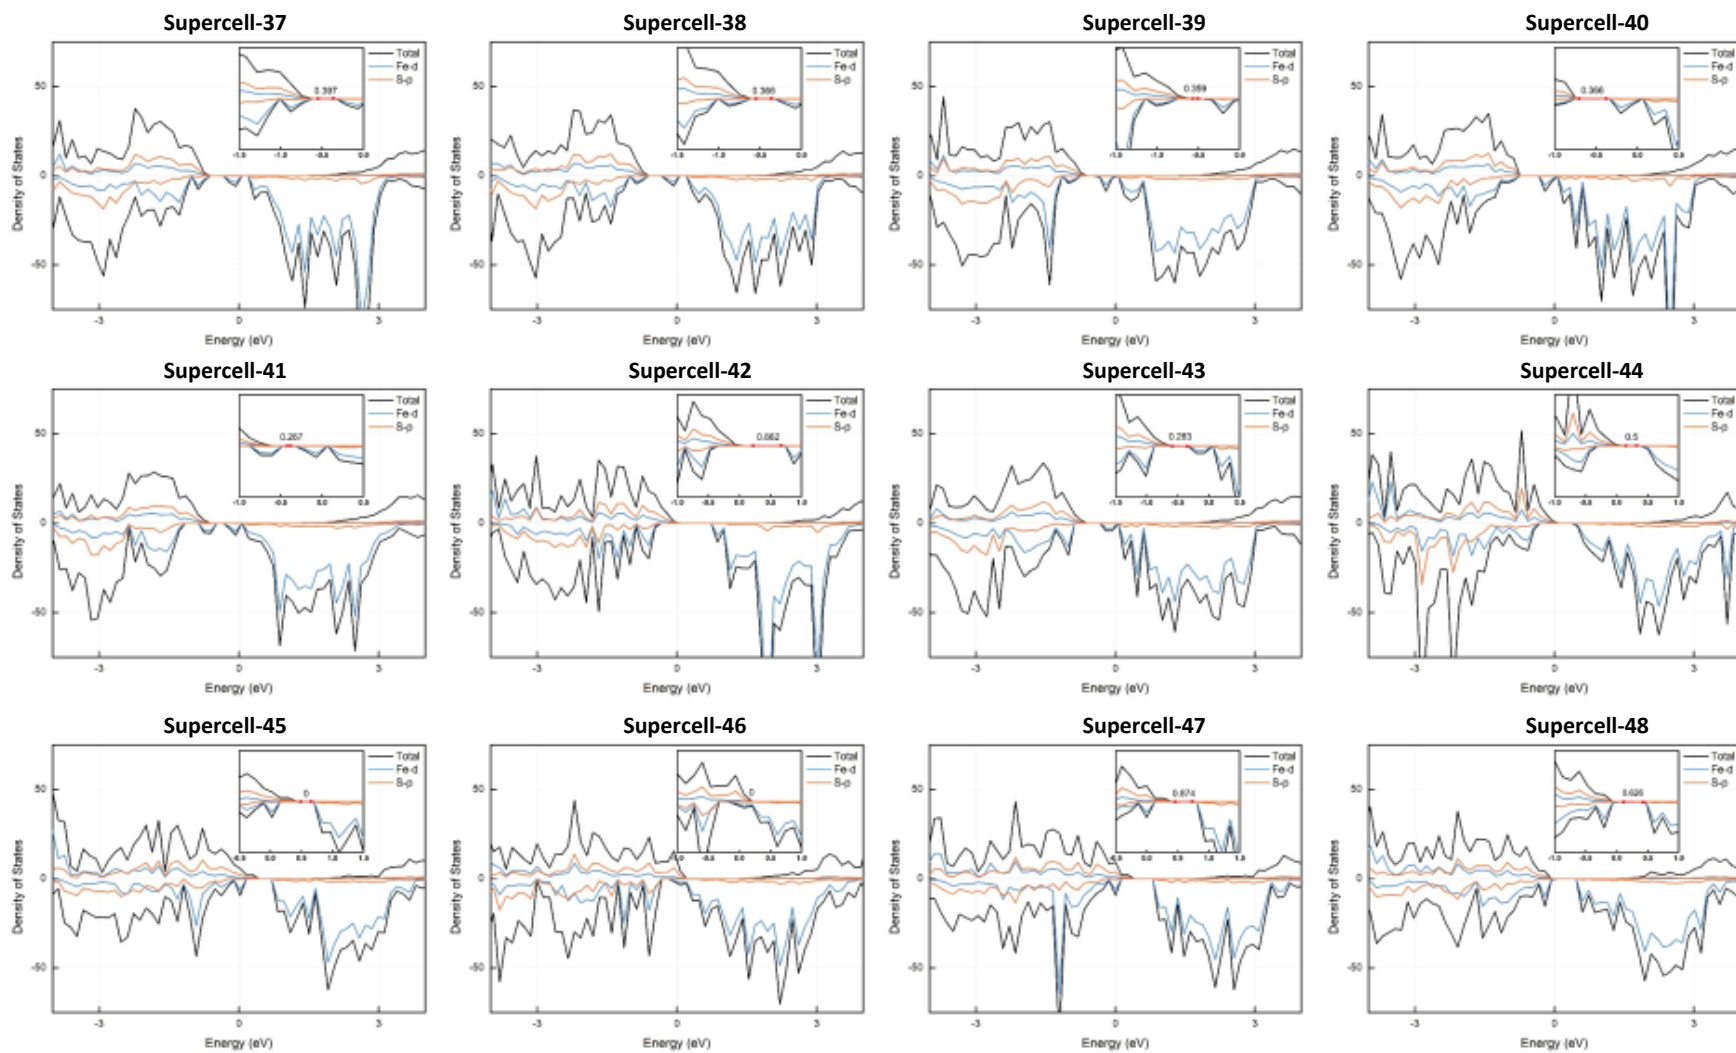

**Fig. S4 (continued)** DFT-calculated band structures and the orbital-projected PDOS.

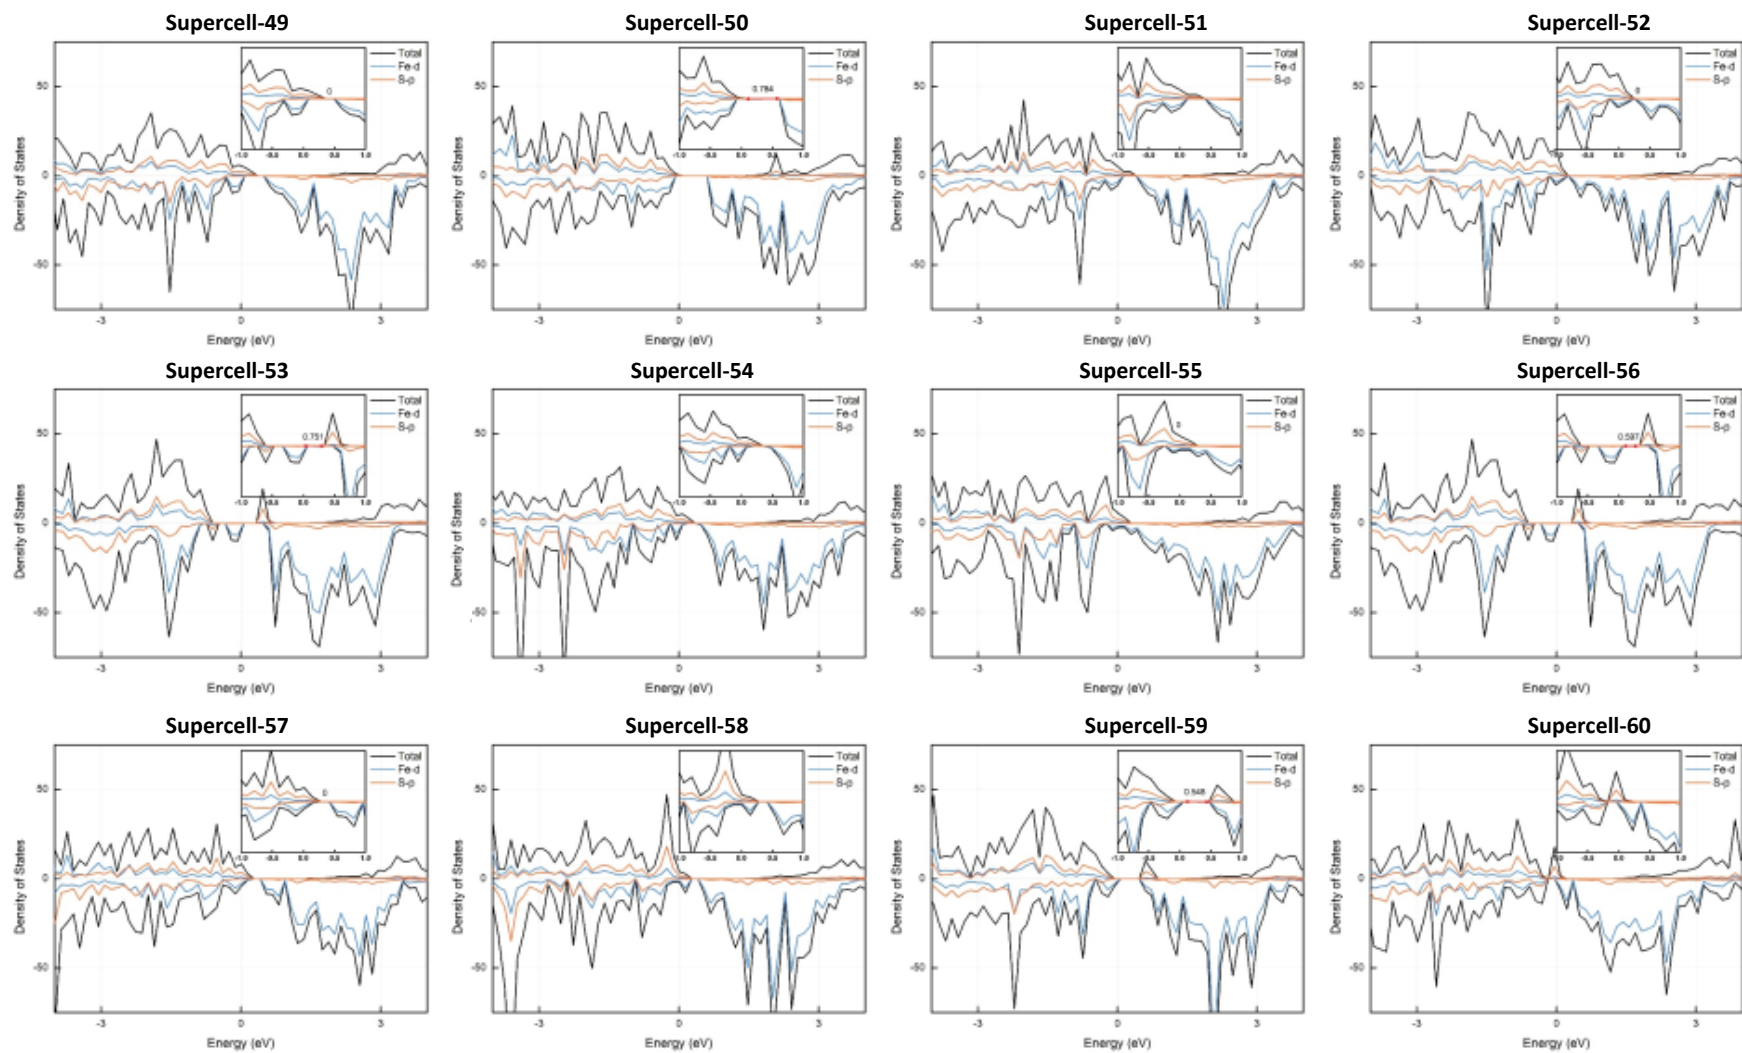

**Fig. S4 (continued)** DFT-calculated band structures and the orbital-projected PDOS.

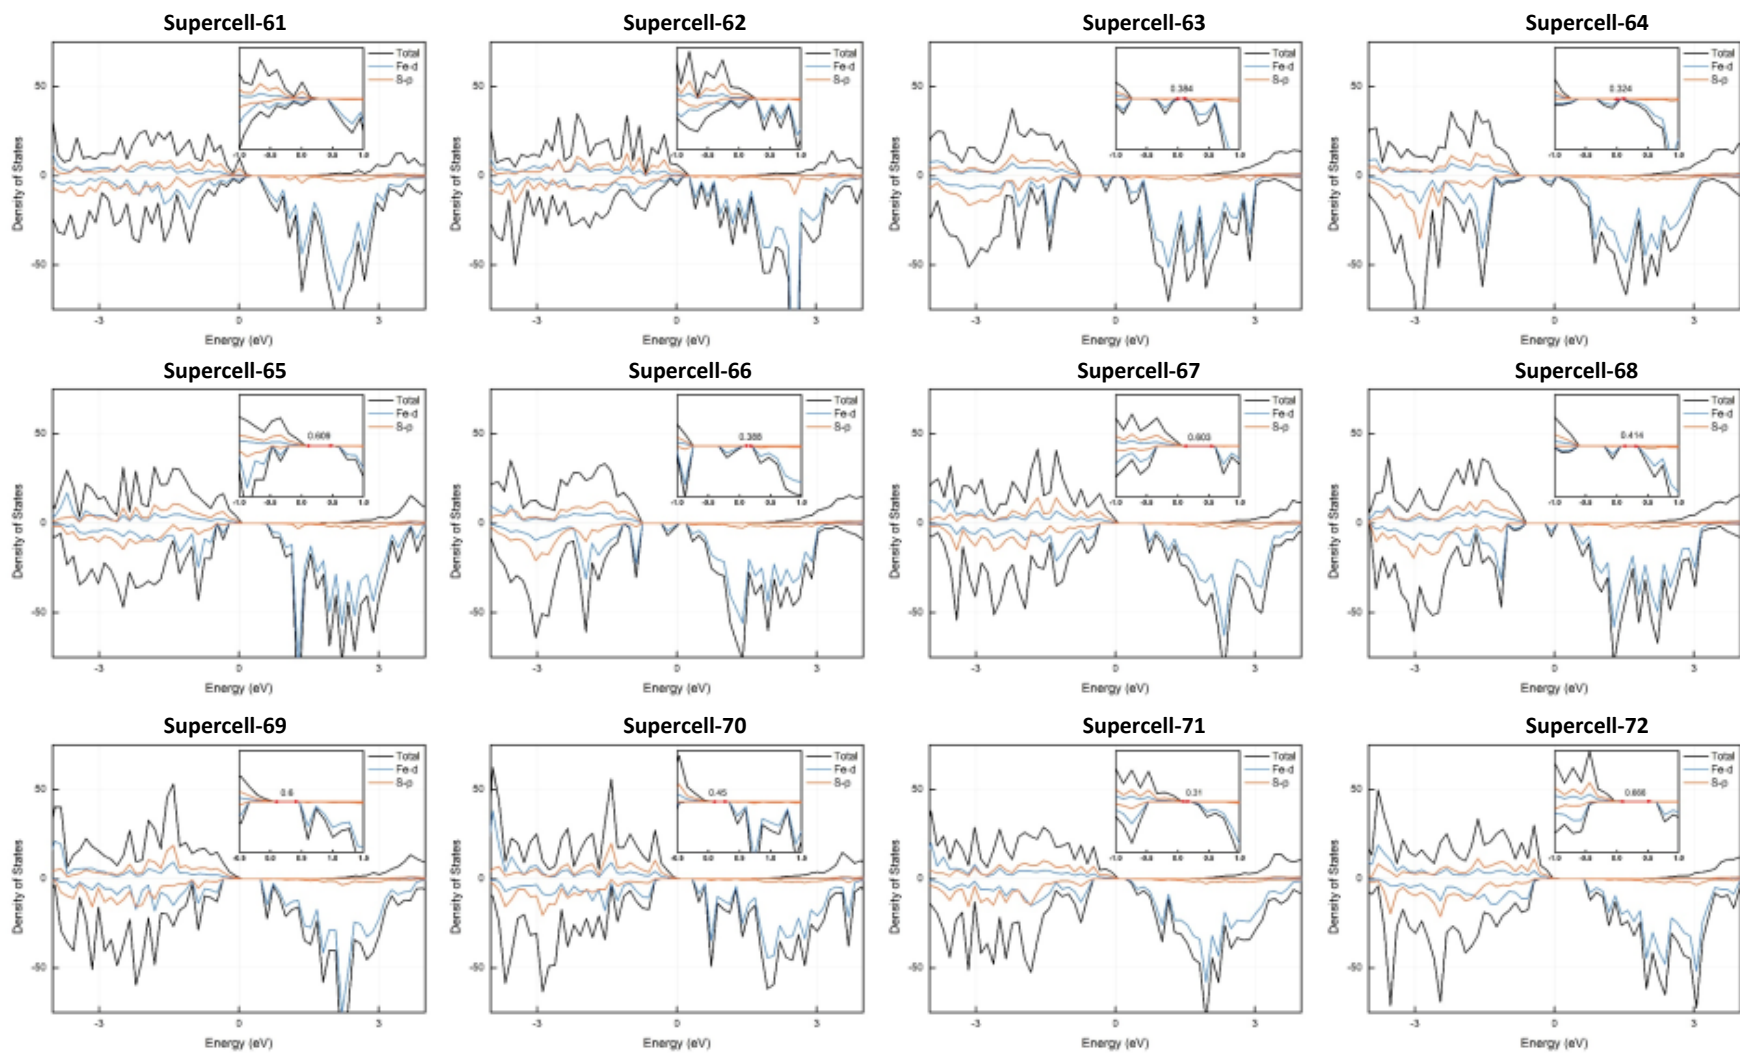

**Fig. S4 (continued)** DFT-calculated band structures and the orbital-projected PDOS.

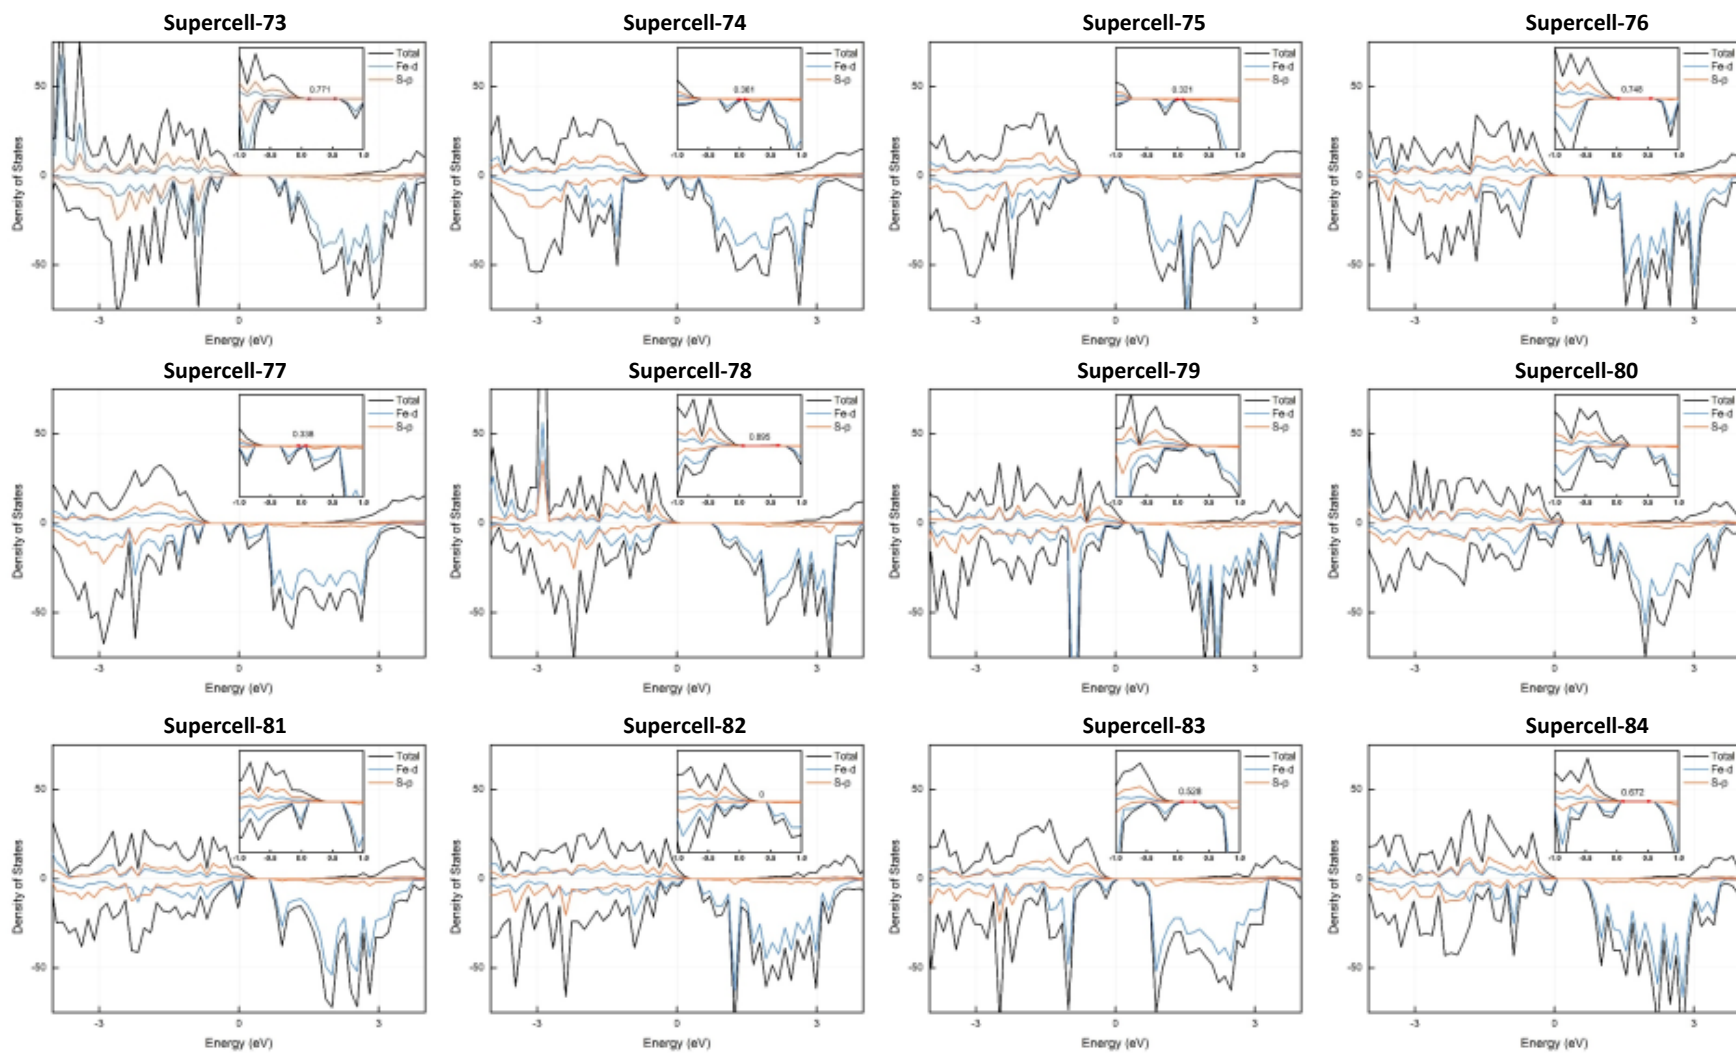



**Fig. S4 (continued)** DFT-calculated band structures and the orbital-projected PDOS.

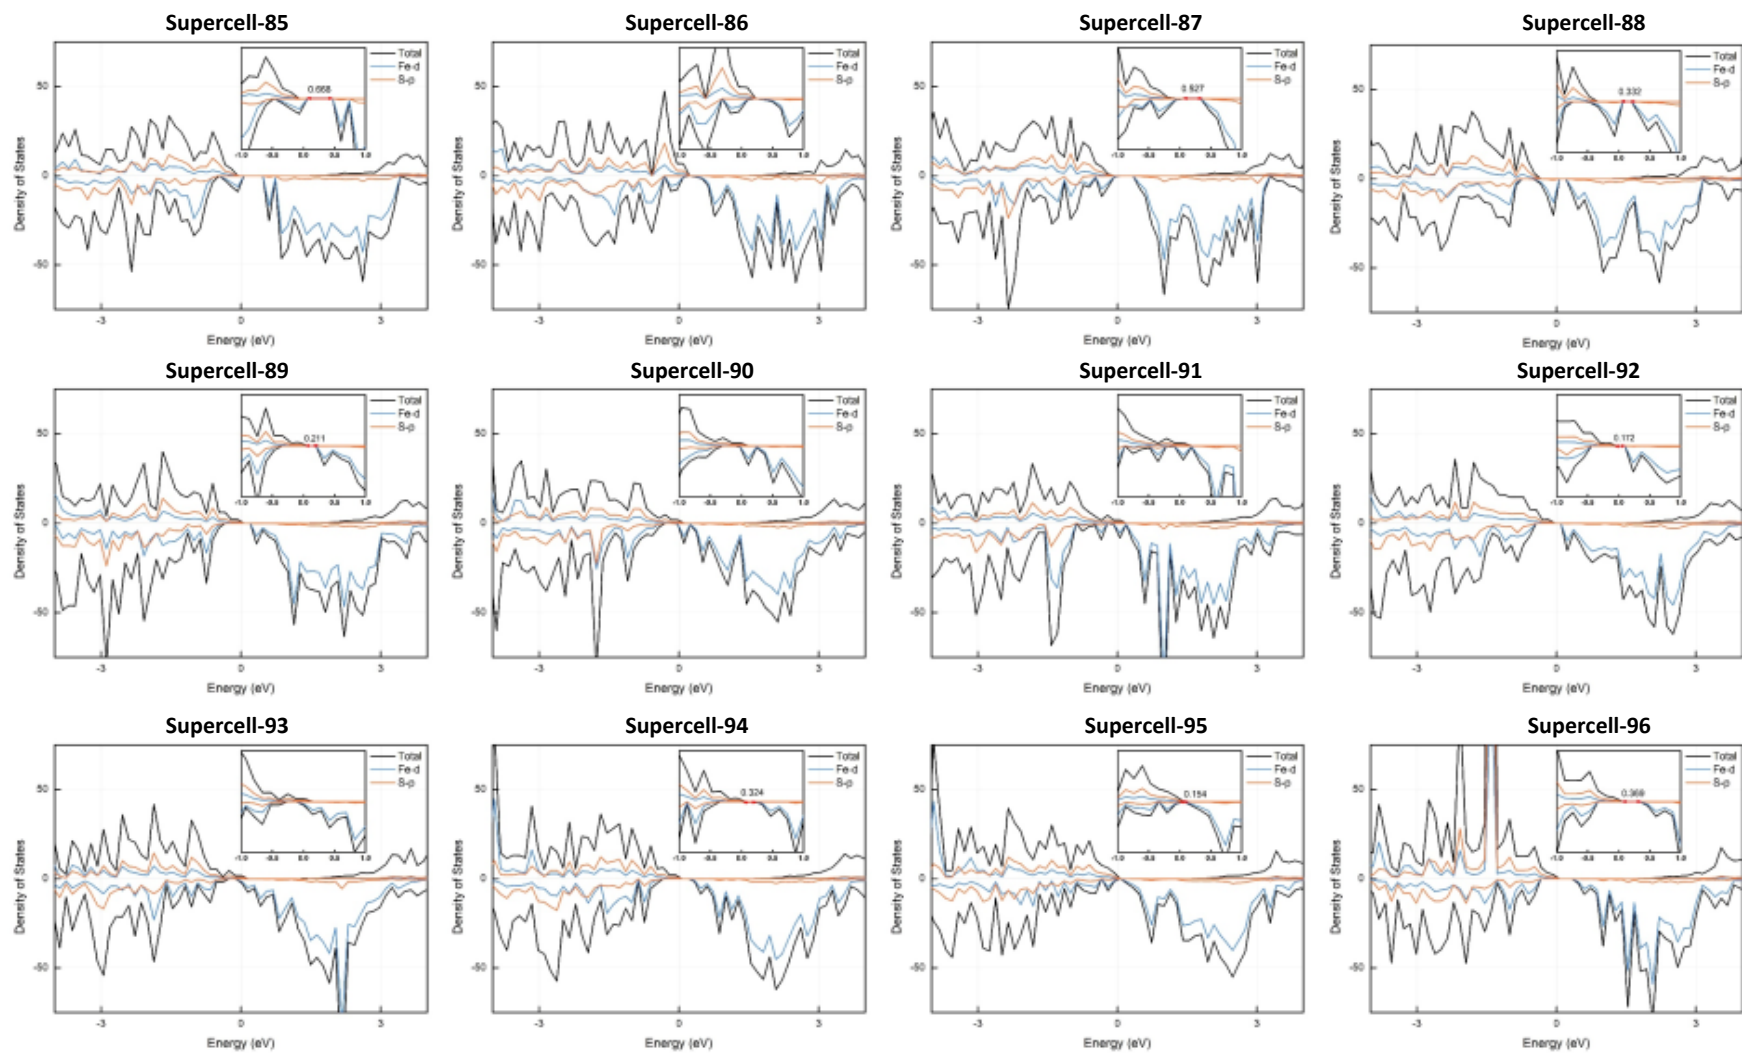

**Fig. S4 (continued)** DFT-calculated band structures and the orbital-projected PDOS.

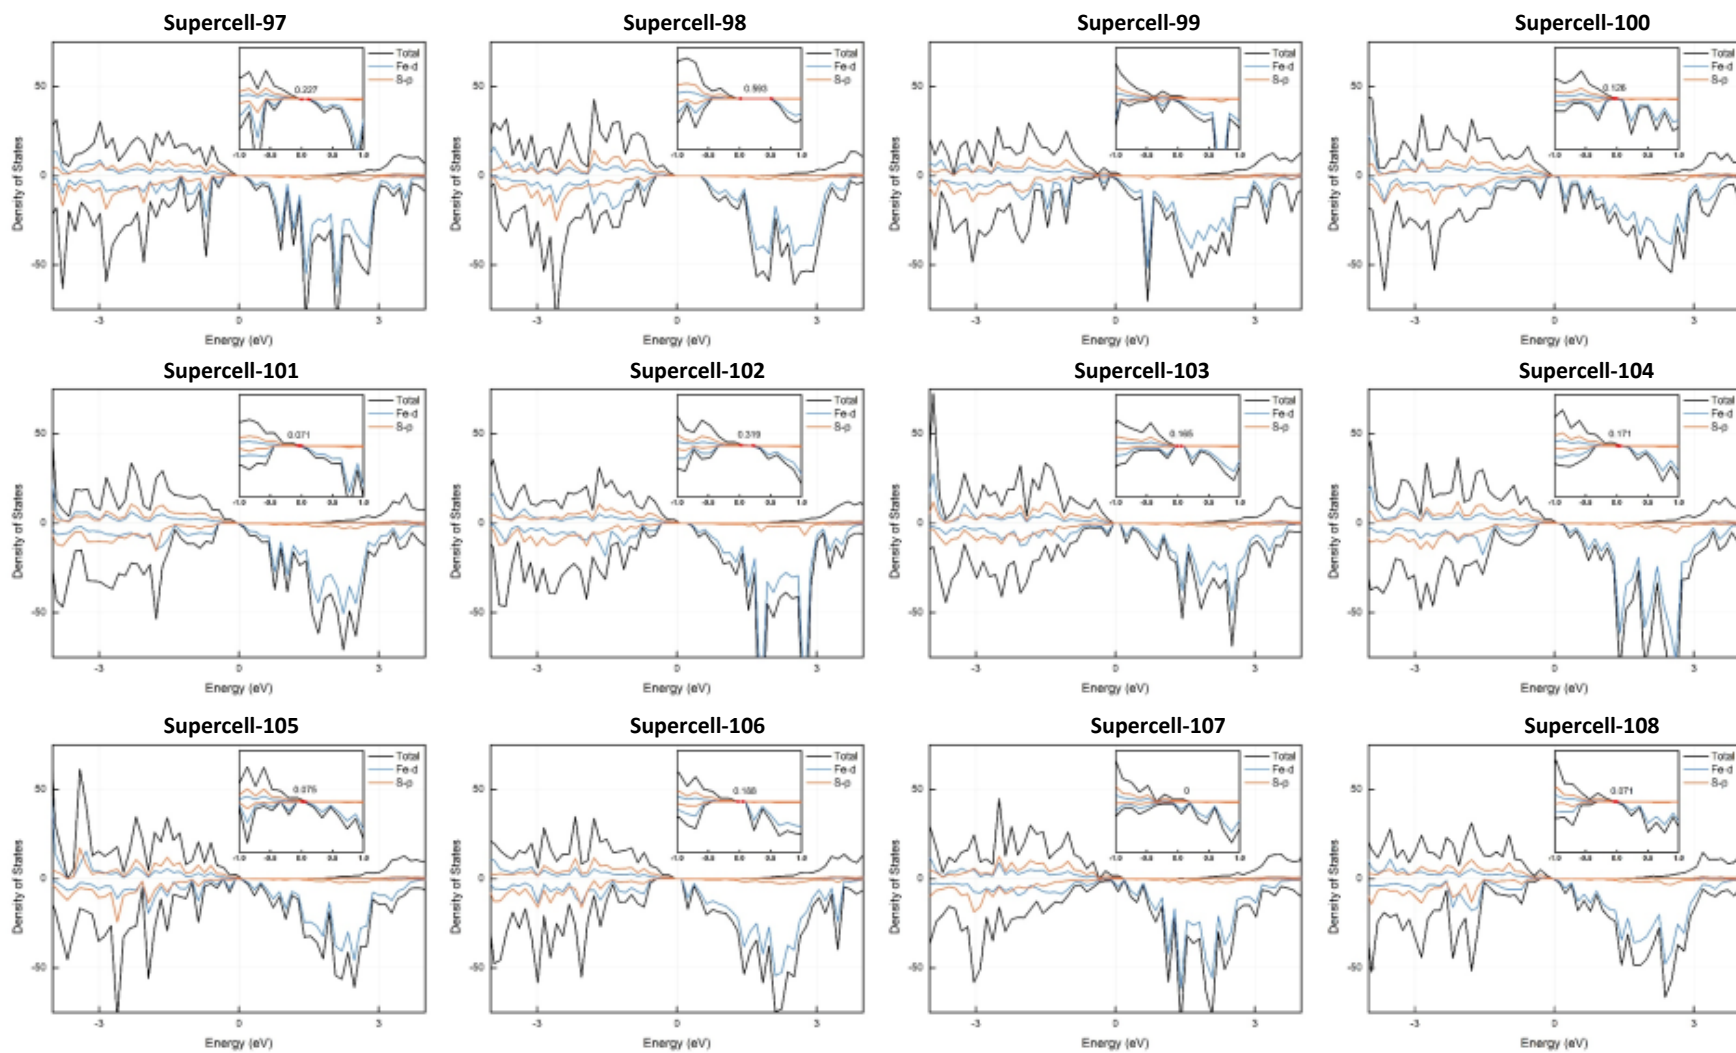

**Fig. S4 (continued)** DFT-calculated band structures and the orbital-projected PDOS.

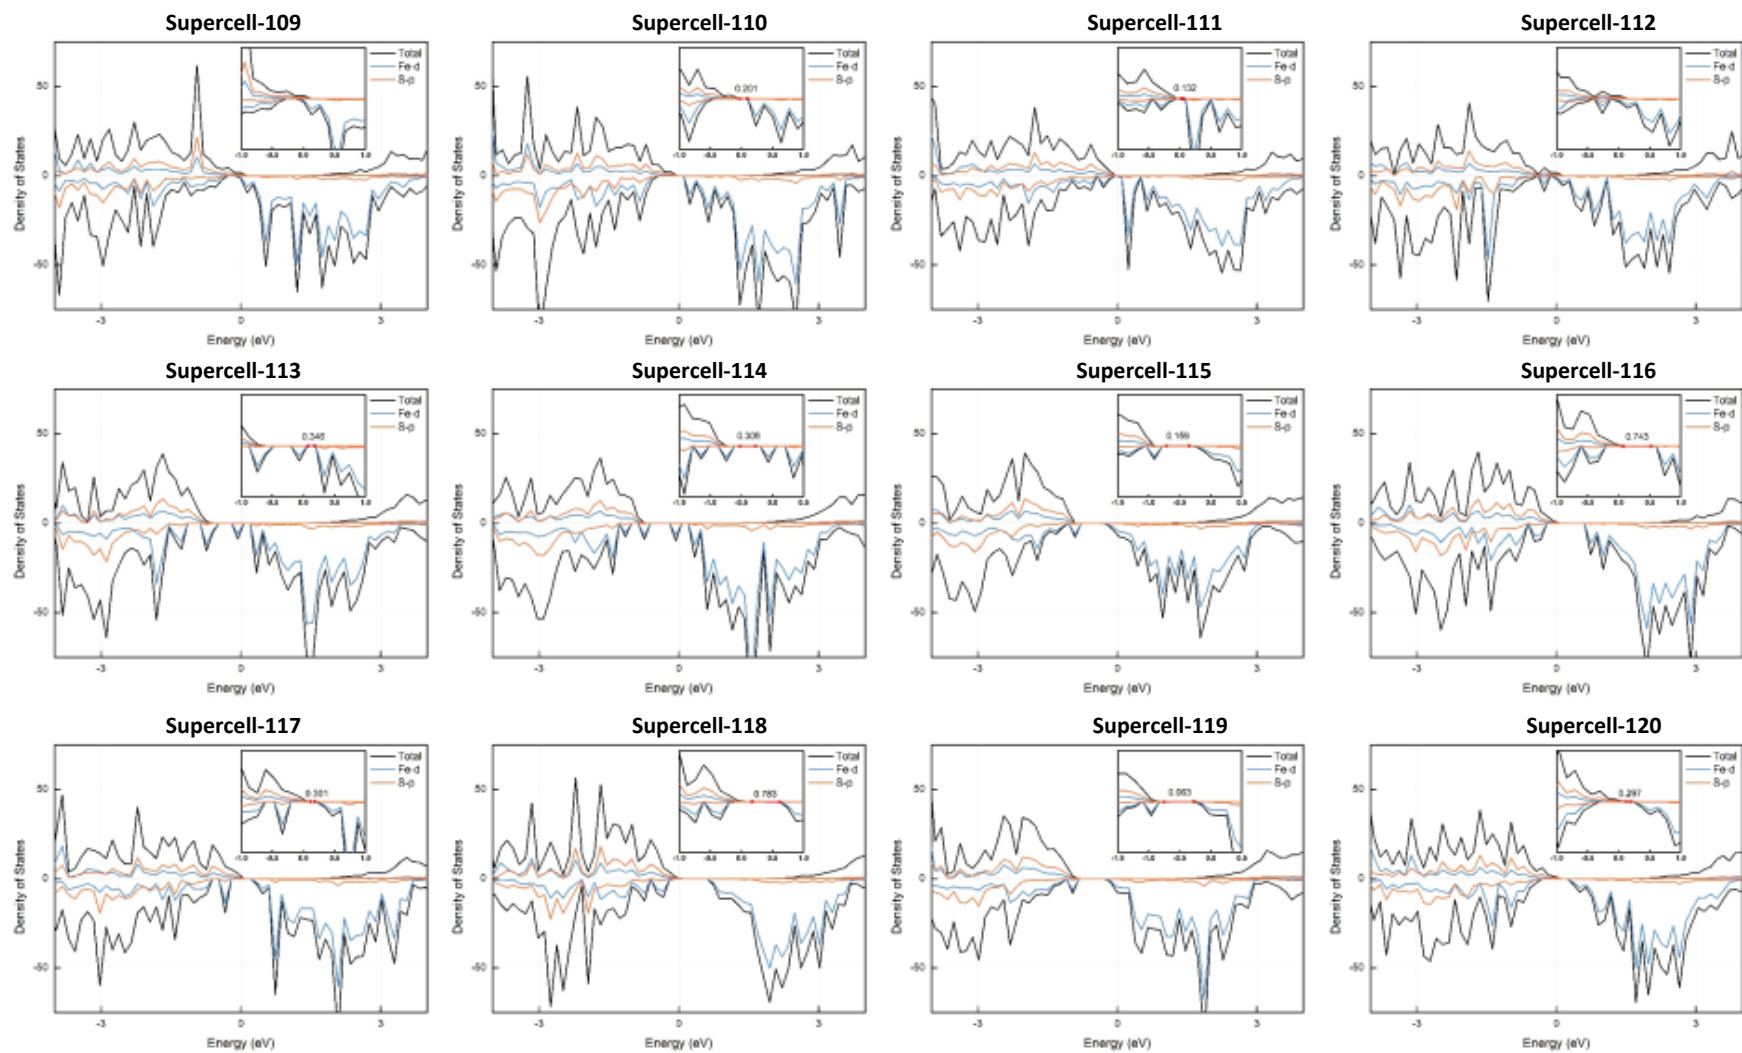



**Fig. S4 (continued)** DFT-calculated band structures and the orbital-projected PDOS.

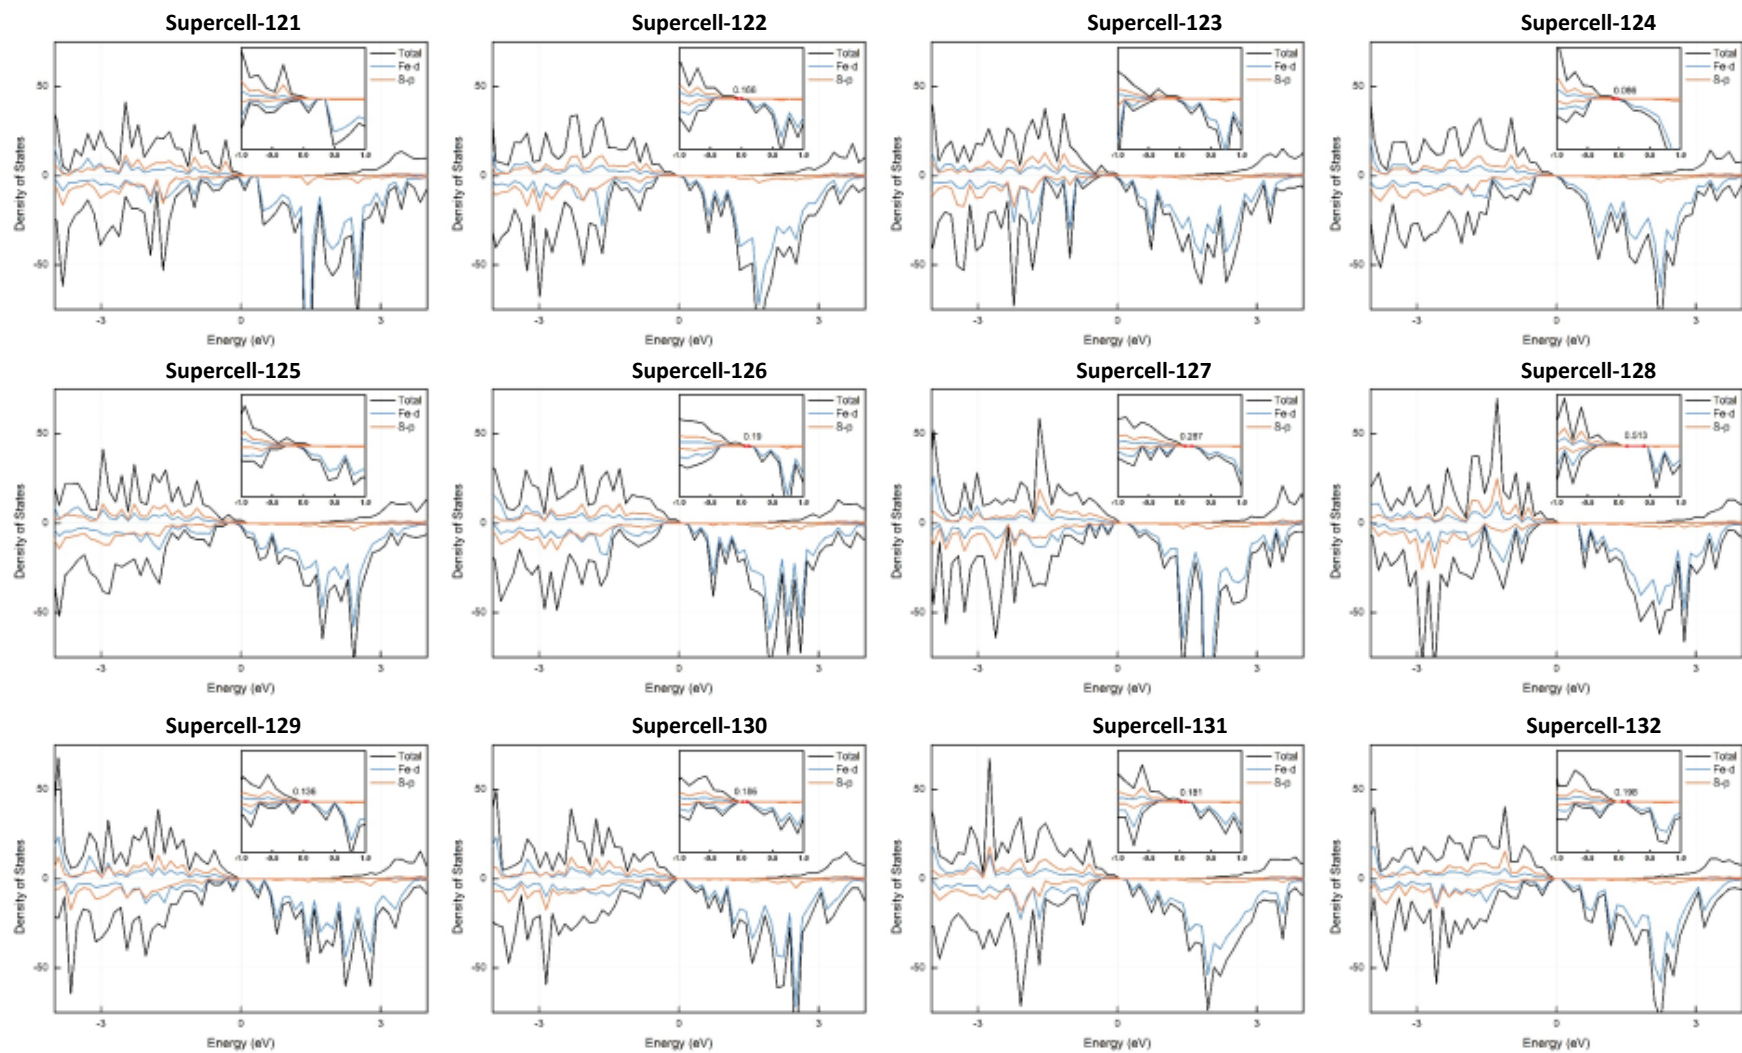

**Fig. S4 (continued)** DFT-calculated band structures and the orbital-projected PDOS.

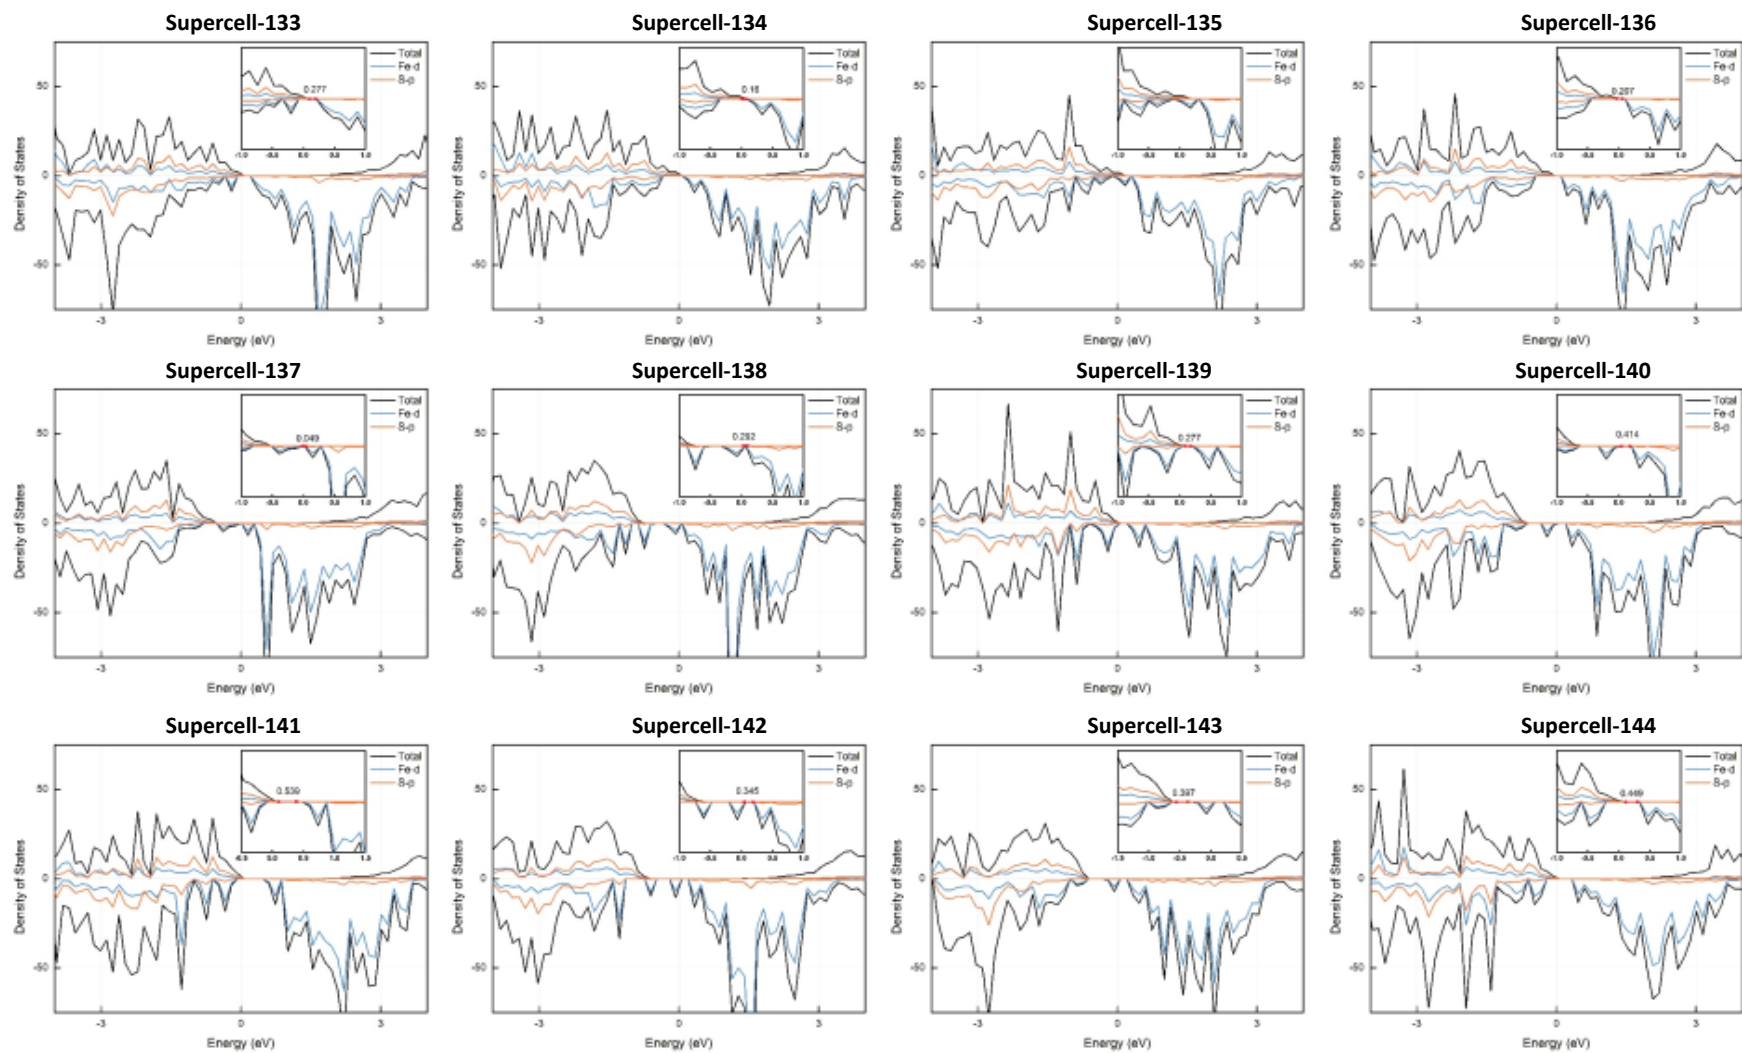

**Fig. S4 (continued)** DFT-calculated band structures and the orbital-projected PDOS.

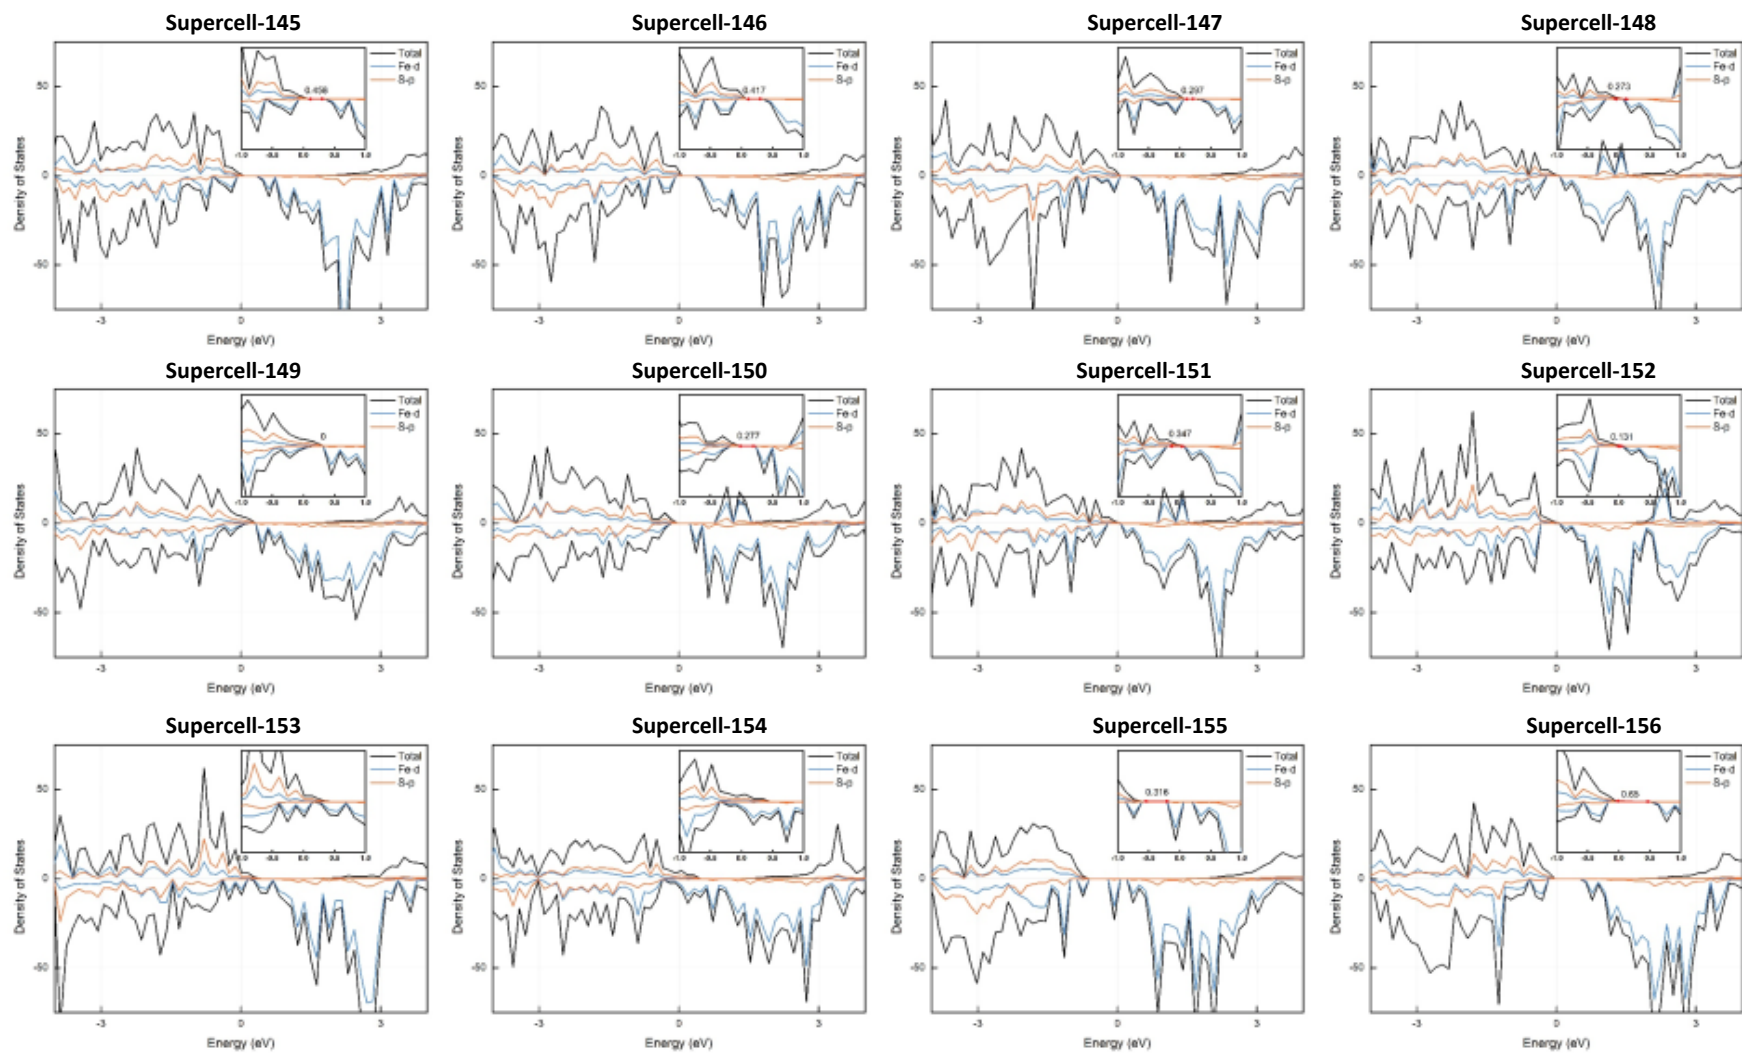

**Fig. S4 (continued)** DFT-calculated band structures and the orbital-projected PDOS.

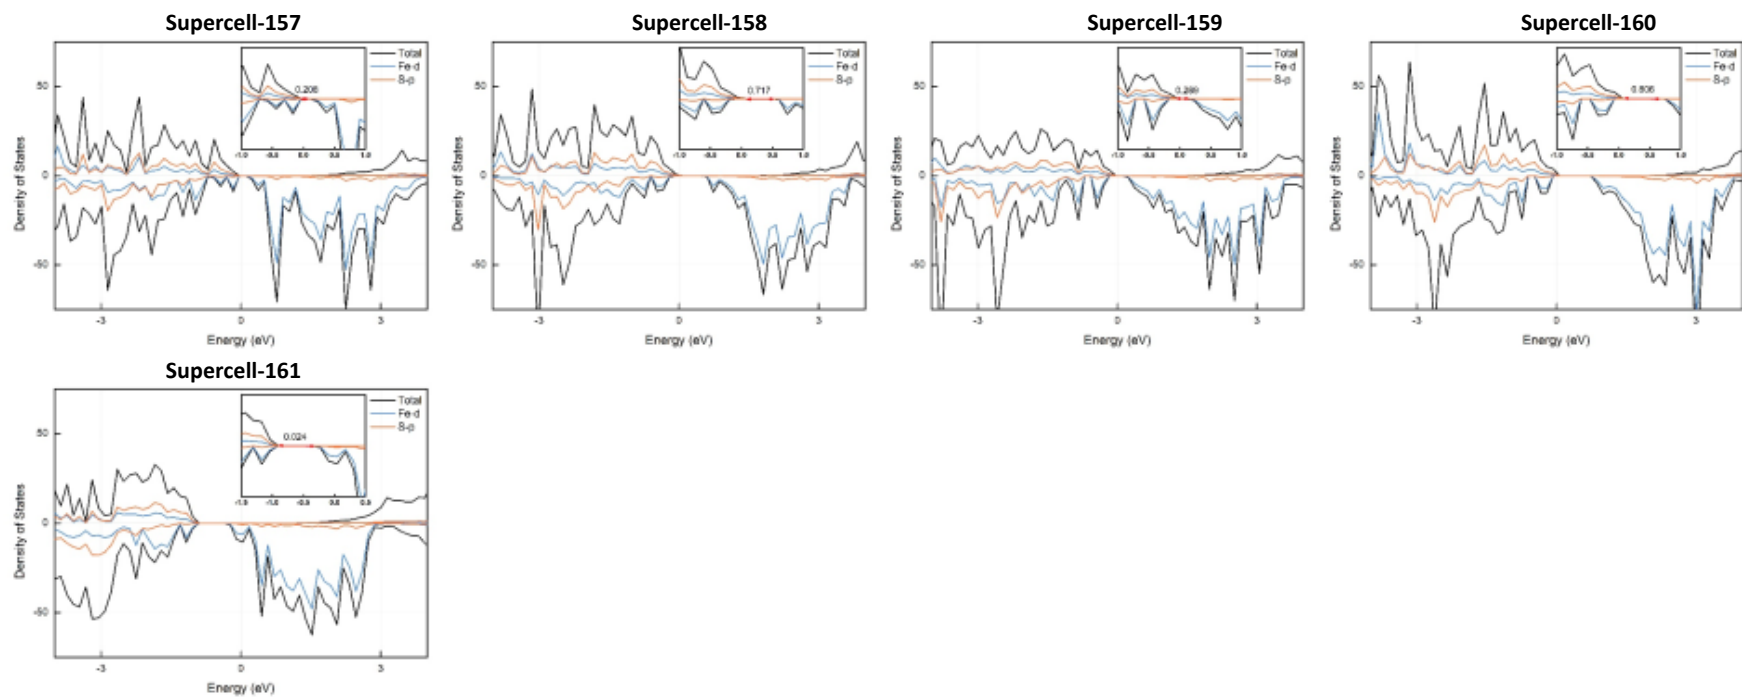

Fig. S5 Cycle stability and Coulombic efficiency during 100 C/D cycles at  $20\text{mA}\cdot\text{g}^{-1}$

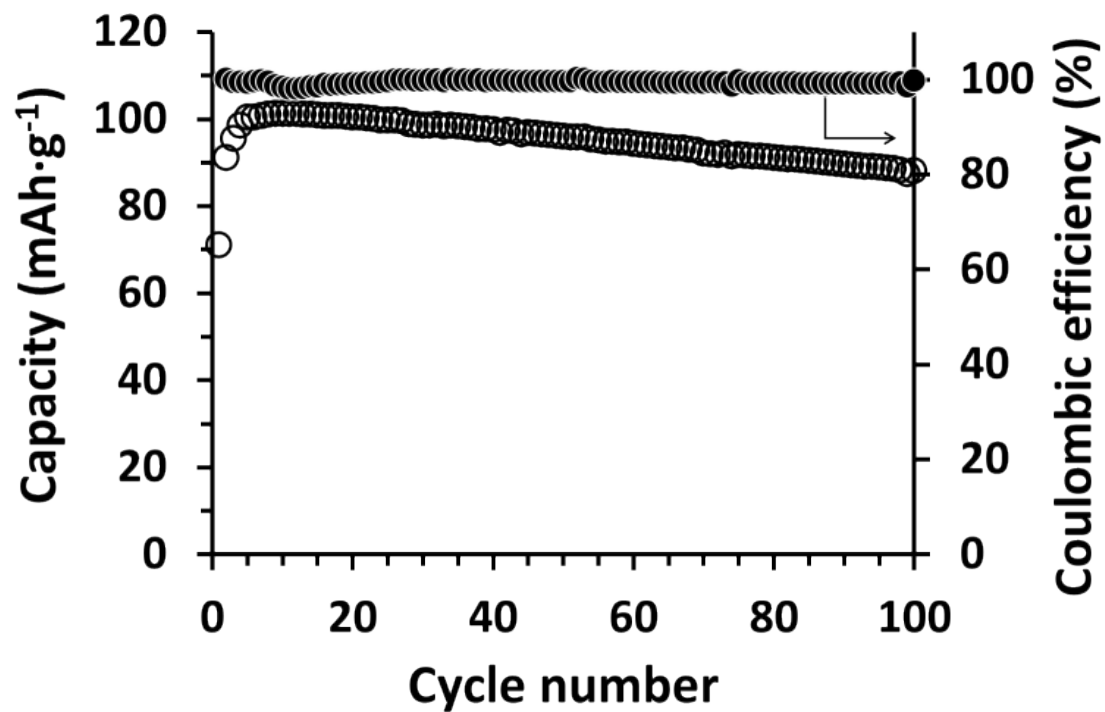

Supplement: d0qi00184h1.pdf [file d0qi00184h1.pdf]
